# Supplementary material for: Fitness change in relation to mutation number in spontaneous mutation accumulation lines of Chlamydomonas reinhardtii
Source: PubMed Central journal article supplement (PMC5765464; doi:10.1111/evo.13360), 2017-10-26

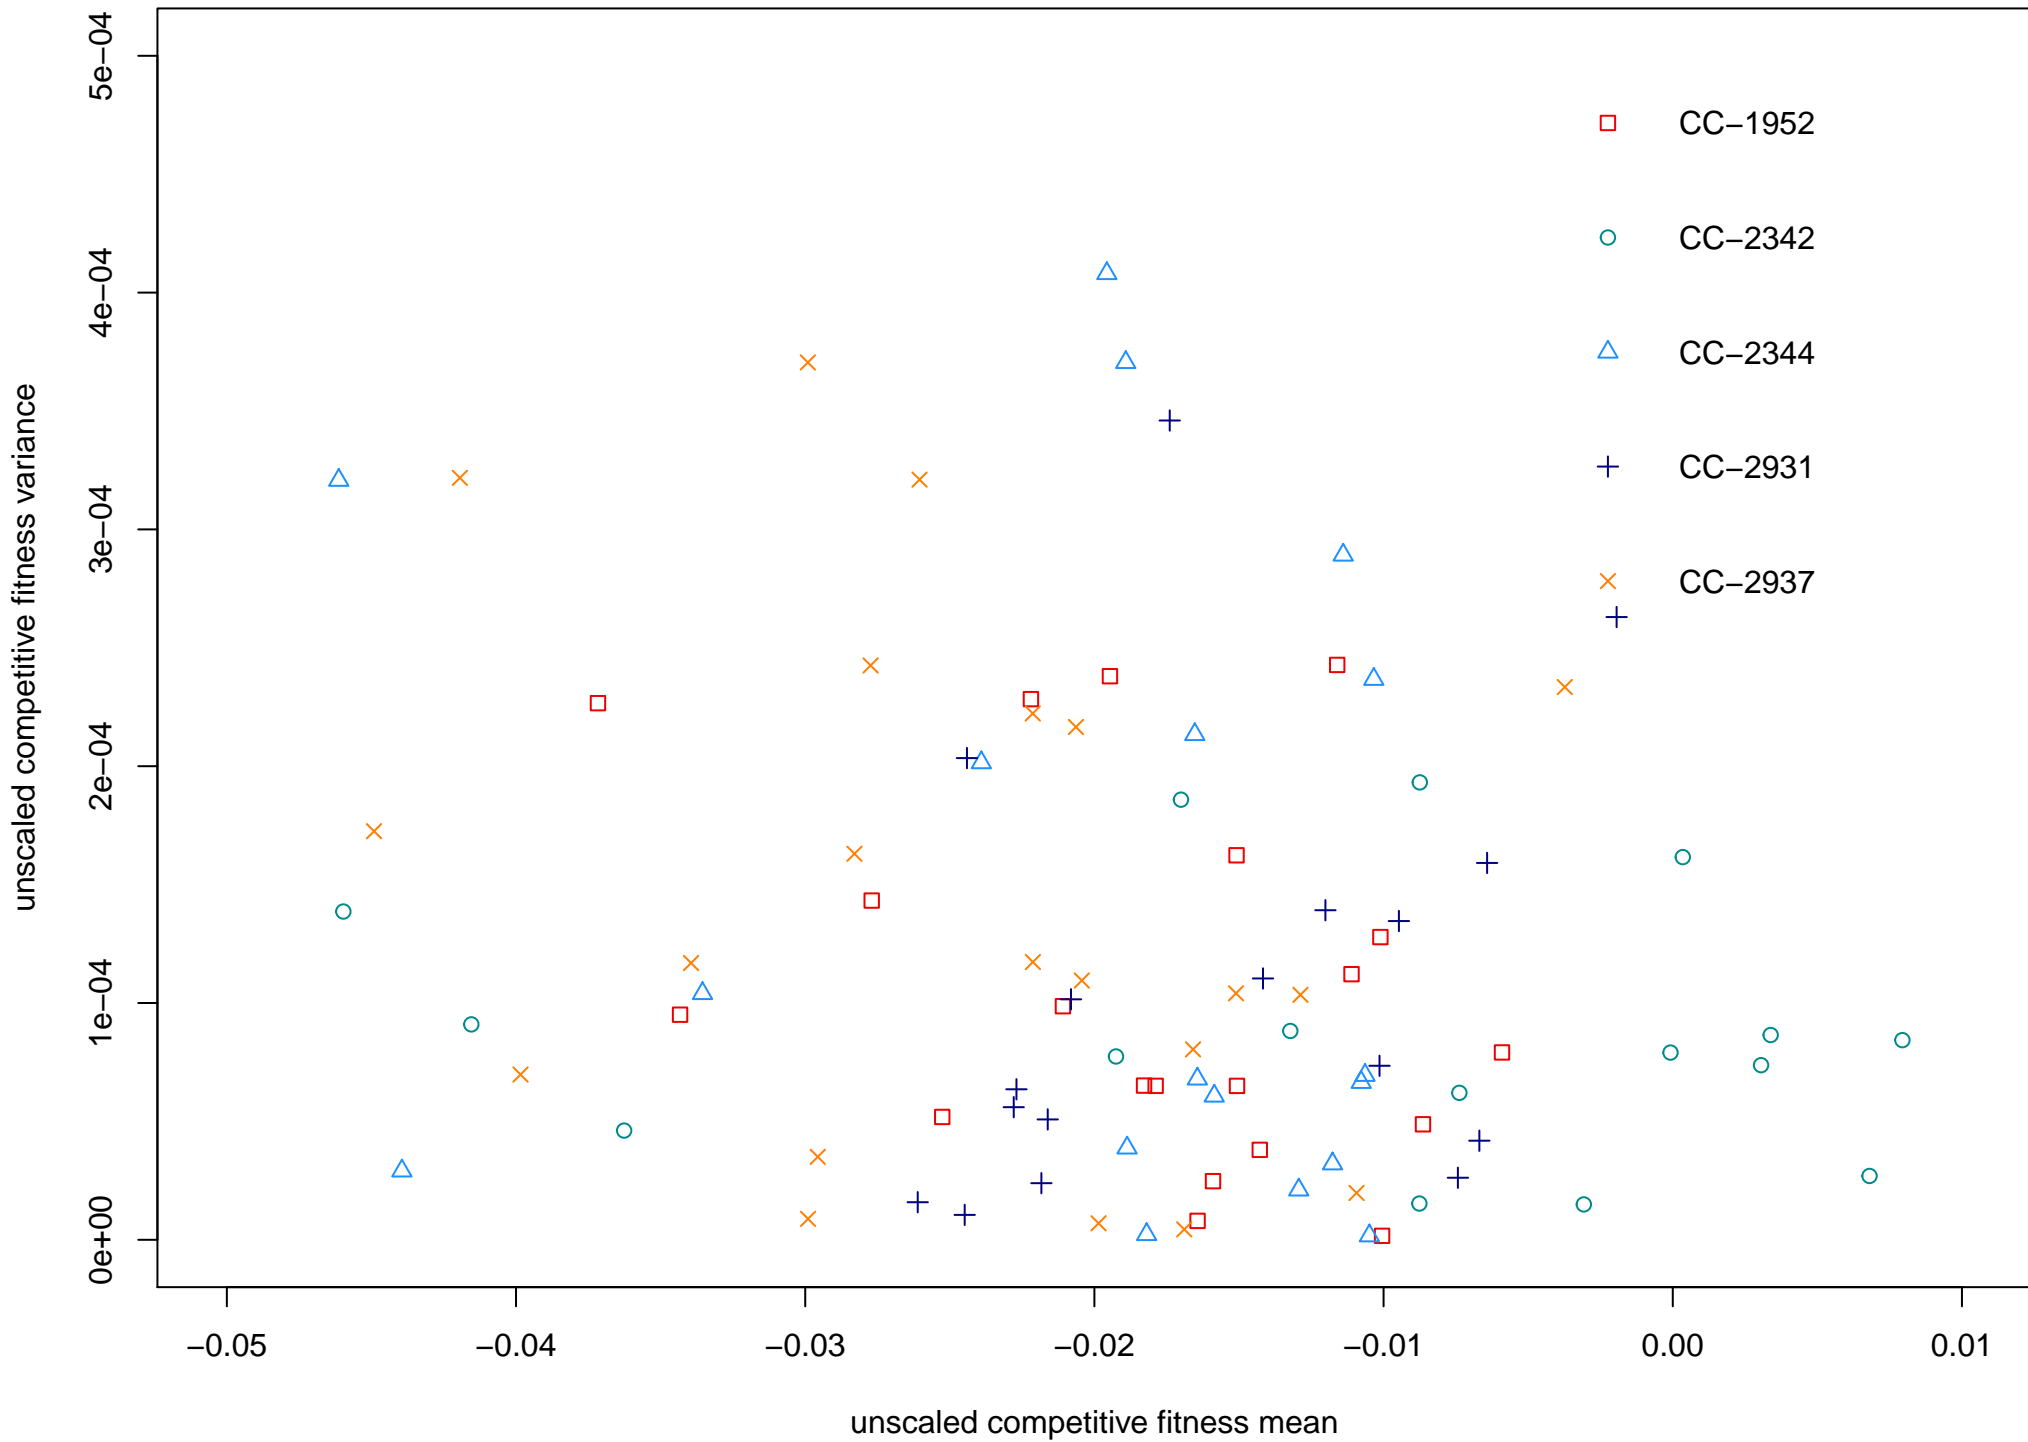

Supplement: EVO-71-2918-s005.pdf [file EVO-71-2918-s005.pdf]
