# Supplementary material for: Fitness change in relation to mutation number in spontaneous mutation accumulation lines of Chlamydomonas reinhardtii
Source: PubMed Central journal article supplement (PMC5765464; doi:10.1111/evo.13360), 2017-10-26
Supplement: EVO-71-2918-s009.pdf [file EVO-71-2918-s009.pdf]

# supplemental\_statistics

intergenic - independent of all others  
genetic - includes everything that is not intergenic  
exonic - includes all genetic except intron  
UTR3 - within genetic and exonic  
utr5 - within genetic and exonic  
intron - within genetic excluding exonic  
CDS - within exonic excluding UTR3 and UTR5

```
## Loading required package: Matrix
##
## Attaching package: 'lmerTest'
## The following object is masked from 'package:lme4':
##
##   lmer
## The following object is masked from 'package:stats':
##
##   step
##
## Attaching package: 'nlme'
## The following object is masked from 'package:lme4':
##
##   lmList
##Models with relative fitness as the response variable##
fit<-lmer(rel2~type+(1|anc),data0)
summary(fit)

## Linear mixed model fit by REML t-tests use Satterthwaite approximations
## to degrees of freedom [lmerMod]
## Formula: rel2 ~ type + (1 | anc)
## Data: data0
##
## REML criterion at convergence: -1695.7
##
## Scaled residuals:
##   Min       1Q   Median       3Q      Max
## -4.2956 -0.6096  0.0662  0.5042  3.8353
##
## Random effects:
##   Groups   Name                Variance Std.Dev.
##   anc      (Intercept)  2.059e-05 0.004538
##   Residual                    1.120e-04 0.010582
## Number of obs: 276, groups:  anc, 5
##
## Fixed effects:
##              Estimate Std. Error      df t value Pr(>|t|)
## (Intercept)  0.999753   0.002299   5.490000 434.809 1.17e-13 ***
## typema      -0.004622   0.001338  270.130000  -3.454 0.000641 ***
## ---
## Signif. codes:  0 '***' 0.001 '**' 0.01 '*' 0.05 '.' 0.1 ' ' 1
##
## Correlation of Fixed Effects:
##      (Intr)
```

```
## typema -0.379
```

```
fit1<-lmer(rel2~total+(1|anc),data0)
summary(fit1)
```

```
## Linear mixed model fit by REML t-tests use Satterthwaite approximations
## to degrees of freedom [lmerMod]
## Formula: rel2 ~ total + (1 | anc)
## Data: data0
##
## REML criterion at convergence: -1682.6
##
## Scaled residuals:
##   Min       1Q   Median       3Q      Max
## -4.5797 -0.5341  0.1380  0.5026  3.7115
##
## Random effects:
## Groups Name Variance Std.Dev.
## anc (Intercept) 1.554e-05 0.003943
## Residual 1.142e-04 0.010688
## Number of obs: 276, groups: anc, 5
##
## Fixed effects:
## Estimate Std. Error df t value Pr(>|t|)
## (Intercept) 9.987e-01 2.003e-03 5.130e+00 498.527 3.25e-13 ***
## total -4.868e-05 1.785e-05 2.739e+02 -2.727 0.0068 **
## ---
## Signif. codes: 0 '***' 0.001 '**' 0.01 '*' 0.05 '.' 0.1 ' ' 1
##
## Correlation of Fixed Effects:
## (Intr)
## total -0.348
```

```
AIC(fit1)
```

```
## [1] -1674.616
```

```
fit2<-lmer(rel2~SNP+indel+(1|anc),data0)
summary(fit2)
```

```
## Linear mixed model fit by REML t-tests use Satterthwaite approximations
## to degrees of freedom [lmerMod]
## Formula: rel2 ~ SNP + indel + (1 | anc)
## Data: data0
##
## REML criterion at convergence: -1667.3
##
## Scaled residuals:
##   Min       1Q   Median       3Q      Max
## -4.5205 -0.5312  0.1298  0.5174  3.7286
##
## Random effects:
## Groups Name Variance Std.Dev.
## anc (Intercept) 1.689e-05 0.004109
## Residual 1.141e-04 0.010681
## Number of obs: 276, groups: anc, 5
```

```

##
## Fixed effects:
##           Estimate Std. Error      df t value Pr(>|t|)
## (Intercept)  9.987e-01  2.069e-03  5.000e+00 482.651 7.26e-13 ***
## SNP          -2.879e-05  2.594e-05  2.730e+02  -1.110   0.268
## indel        -1.409e-04  9.011e-05  2.714e+02  -1.563   0.119
## ---
## Signif. codes:  0 '***' 0.001 '**' 0.01 '*' 0.05 '.' 0.1 ' ' 1
##
## Correlation of Fixed Effects:
##      (Intr) SNP
## SNP    -0.229
## indel  -0.071 -0.575

```

```
AIC(fit2)
```

```
## [1] -1657.255
```

```
fit3<-lmer(rel2~nonsynonymous+synonymous+(1|anc),data0)
summary(fit3)
```

```

## Linear mixed model fit by REML t-tests use Satterthwaite approximations
## to degrees of freedom [lmerMod]
## Formula: rel2 ~ nonsynonymous + synonymous + (1 | anc)
## Data: data0
##
## REML criterion at convergence: -1675.2
##
## Scaled residuals:
##      Min       1Q   Median       3Q      Max
## -4.6521 -0.5507  0.1088  0.5120  3.8165
##
## Random effects:
## Groups Name          Variance Std.Dev.
## anc    (Intercept) 1.453e-05 0.003812
## Residual          1.129e-04 0.010626
## Number of obs: 276, groups: anc, 5
##
## Fixed effects:
##           Estimate Std. Error      df t value Pr(>|t|)
## (Intercept)  9.991e-01  1.946e-03  5.140e+00 513.444 2.57e-13 ***
## nonsynonymous -1.531e-04  1.242e-04  2.725e+02  -1.232   0.219
## synonymous   -2.586e-04  2.367e-04  2.717e+02  -1.093   0.276
## ---
## Signif. codes:  0 '***' 0.001 '**' 0.01 '*' 0.05 '.' 0.1 ' ' 1
##
## Correlation of Fixed Effects:
##      (Intr) nnsynn
## nonsynonyms -0.130
## synonymous  -0.105 -0.775

```

```
fit4<-lmer(rel2~intergenic+intronic+CDS+utr+(1|anc),data0)
summary(fit4)
```

```

## Linear mixed model fit by REML t-tests use Satterthwaite approximations
## to degrees of freedom [lmerMod]

```

```

## Formula: rel2 ~ intergenic + intronic + CDS + utr + (1 | anc)
## Data: data0
##
## REML criterion at convergence: -1650.6
##
## Scaled residuals:
##   Min      1Q  Median      3Q      Max
## -4.7408 -0.5655  0.0981  0.4959  4.1134
##
## Random effects:
##   Groups   Name          Variance Std.Dev.
##   anc      (Intercept) 1.261e-05 0.003552
##   Residual                1.108e-04 0.010526
## Number of obs: 276, groups:  anc, 5
##
## Fixed effects:
##              Estimate Std. Error      df t value Pr(>|t|)
## (Intercept)  9.989e-01  1.846e-03  5.160e+00 541.051 1.81e-13 ***
## intergenic   1.906e-04  3.124e-04  2.705e+02   0.610 0.542231
## intronic     2.841e-04  1.361e-04  2.707e+02   2.088 0.037761 *
## CDS          -4.752e-04  1.284e-04  2.709e+02  -3.702 0.000259 ***
## utr          -1.926e-05  1.690e-04  2.646e+02  -0.114 0.909339
## ---
## Signif. codes:  0 '***' 0.001 '**' 0.01 '*' 0.05 '.' 0.1 ' ' 1
##
## Correlation of Fixed Effects:
##              (Intr) intrgn intrnc CDS
## intergenic  -0.054
## intronic    -0.014 -0.262
## CDS         -0.091 -0.122 -0.534
## utr         -0.010 -0.249 -0.360 -0.314

```

```
AIC(fit4)
```

```
## [1] -1636.566
```

```
fit5<-lmer(rel2~exonic+intronic+intergenic+(1|anc),data0)
summary(fit5)
```

```

## Linear mixed model fit by REML t-tests use Satterthwaite approximations
## to degrees of freedom [lmerMod]
## Formula: rel2 ~ exonic + intronic + intergenic + (1 | anc)
## Data: data0
##
## REML criterion at convergence: -1661.9
##
## Scaled residuals:
##   Min      1Q  Median      3Q      Max
## -4.7368 -0.5651  0.1256  0.5152  4.1741
##
## Random effects:
##   Groups   Name          Variance Std.Dev.
##   anc      (Intercept) 1.057e-05 0.003252
##   Residual                1.121e-04 0.010586
## Number of obs: 276, groups:  anc, 5

```

```

##
## Fixed effects:
##           Estimate Std. Error      df t value Pr(>|t|)
## (Intercept)  9.988e-01  1.733e-03  5.450e+00  576.432  2.98e-14 ***
## exonic      -2.988e-04  8.558e-05  2.670e+02  -3.492  0.000561 ***
## intronic    2.796e-04  1.367e-04  2.720e+02   2.046  0.041699 *
## intergenic  2.622e-04  3.124e-04  2.712e+02   0.839  0.402054
## ---
## Signif. codes:  0 '***' 0.001 '**' 0.01 '*' 0.05 '.' 0.1 ' ' 1
##
## Correlation of Fixed Effects:
##           (Intr) exonic intrnc
## exonic      -0.095
## intronic    -0.018 -0.770
## intergenic  -0.054 -0.311 -0.258
AIC(fit5)

## [1] -1649.935
Mutational effects and competitive fitness
##Models with competitive fitness as the response variable##
fit<-lmer(w_ma~type+(1|anc),data0)
summary(fit)

## Linear mixed model fit by REML t-tests use Satterthwaite approximations
## to degrees of freedom [lmerMod]
## Formula: w_ma ~ type + (1 | anc)
## Data: data0
##
## REML criterion at convergence: -1555.5
##
## Scaled residuals:
##      Min       1Q   Median       3Q      Max
## -3.1986 -0.5400  0.0633  0.7303  2.5003
##
## Random effects:
## Groups Name Variance Std.Dev.
## anc (Intercept) 1.882e-05 0.004338
## Residual 1.882e-04 0.013720
## Number of obs: 276, groups: anc, 5
##
## Fixed effects:
##           Estimate Std. Error      df t value Pr(>|t|)
## (Intercept) -0.012956  0.002393  6.610000  -5.413  0.0012 **
## typema      -0.007507  0.001735  270.120000  -4.327  2.13e-05 ***
## ---
## Signif. codes:  0 '***' 0.001 '**' 0.01 '*' 0.05 '.' 0.1 ' ' 1
##
## Correlation of Fixed Effects:
##           (Intr)
## typema -0.472
AIC(fit)

## [1] -1547.502

```

```
fit1a<-lmer(w_ma~total+(1|anc),data0)
summary(fit1a)
```

```
## Linear mixed model fit by REML t-tests use Satterthwaite approximations
## to degrees of freedom [lmerMod]
## Formula: w_ma ~ total + (1 | anc)
## Data: data0
##
## REML criterion at convergence: -1533.8
##
## Scaled residuals:
##   Min       1Q   Median       3Q      Max
## -3.3737 -0.5931  0.1303  0.6644  2.2512
##
## Random effects:
## Groups Name Variance Std.Dev.
## anc (Intercept) 2.535e-05 0.005035
## Residual 1.968e-04 0.014029
## Number of obs: 276, groups: anc, 5
##
## Fixed effects:
## Estimate Std. Error df t value Pr(>|t|)
## (Intercept) -1.575e-02 2.574e-03 5.100e+00 -6.120 0.00157 **
## total -5.326e-05 2.342e-05 2.738e+02 -2.274 0.02375 *
## ---
## Signif. codes: 0 '***' 0.001 '**' 0.01 '*' 0.05 '.' 0.1 ' ' 1
##
## Correlation of Fixed Effects:
## (Intr)
## total -0.355
```

```
AIC(fit1a)
```

```
## [1] -1525.755
```

```
fit2a<-lmer(w_ma~SNP+indel+(1|anc),data0)
summary(fit2a)
```

```
## Linear mixed model fit by REML t-tests use Satterthwaite approximations
## to degrees of freedom [lmerMod]
## Formula: w_ma ~ SNP + indel + (1 | anc)
## Data: data0
##
## REML criterion at convergence: -1518
##
## Scaled residuals:
##   Min       1Q   Median       3Q      Max
## -3.3701 -0.5969  0.1200  0.6836  2.2311
##
## Random effects:
## Groups Name Variance Std.Dev.
## anc (Intercept) 2.462e-05 0.004962
## Residual 1.975e-04 0.014053
## Number of obs: 276, groups: anc, 5
##
```

```
## Fixed effects:
##           Estimate Std. Error      df t value Pr(>|t|)
## (Intercept) -1.575e-02  2.547e-03  5.080e+00  -6.186  0.00152 **
## SNP          -4.239e-05  3.408e-05  2.727e+02  -1.244  0.21467
## indel        -1.035e-04  1.183e-04  2.697e+02  -0.875  0.38236
## ---
## Signif. codes:  0 '***' 0.001 '**' 0.01 '*' 0.05 '.' 0.1 ' ' 1
##
## Correlation of Fixed Effects:
##      (Intr) SNP
## SNP    -0.244
## indel -0.076 -0.575
```

```
AIC(fit2a)
```

```
## [1] -1508.041
```

```
fit3a<-lmer(w_ma~nonsynonymous+synonymous+(1|anc),data0)
summary(fit3a)
```

```
## Linear mixed model fit by REML t-tests use Satterthwaite approximations
## to degrees of freedom [lmerMod]
## Formula: w_ma ~ nonsynonymous + synonymous + (1 | anc)
## Data: data0
##
## REML criterion at convergence: -1526.9
##
## Scaled residuals:
##      Min       1Q   Median       3Q      Max
## -3.2411 -0.6198  0.1403  0.6845  2.2597
##
## Random effects:
## Groups Name          Variance Std.Dev.
## anc    (Intercept)  2.767e-05 0.00526
## Residual              1.941e-04 0.01393
## Number of obs: 276, groups:  anc, 5
##
## Fixed effects:
##           Estimate Std. Error      df t value Pr(>|t|)
## (Intercept) -1.504e-02  2.655e-03  4.970e+00  -5.665  0.00243 **
## nonsynonymous -2.471e-04  1.629e-04  2.723e+02  -1.517  0.13049
## synonymous    -1.721e-04  3.104e-04  2.714e+02  -0.554  0.57972
## ---
## Signif. codes:  0 '***' 0.001 '**' 0.01 '*' 0.05 '.' 0.1 ' ' 1
##
## Correlation of Fixed Effects:
##      (Intr) nnsynn
## nonsynonyms -0.126
## synonymous  -0.101 -0.775
```

```
AIC(fit3a)
```

```
## [1] -1516.858
```

```
fit4a<-lmer(w_ma~intergenic+intronic+CDS+utr+(1|anc),data0)
summary(fit4a)
```

```

## Linear mixed model fit by REML t-tests use Satterthwaite approximations
## to degrees of freedom [lmerMod]
## Formula: w_ma ~ intergenic + intronic + CDS + utr + (1 | anc)
## Data: data0
##
## REML criterion at convergence: -1504.5
##
## Scaled residuals:
##   Min      1Q  Median      3Q      Max
## -2.9741 -0.5930  0.1359  0.6943  2.3844
##
## Random effects:
##   Groups   Name          Variance Std.Dev.
##   anc      (Intercept) 3.052e-05 0.005524
##   Residual                1.891e-04 0.013750
## Number of obs: 276, groups: anc, 5
##
## Fixed effects:
##              Estimate Std. Error      df t value Pr(>|t|)
## (Intercept) -1.538e-02  2.761e-03  4.740e+00  -5.570 0.003038 **
## intergenic   2.338e-04  4.085e-04  2.699e+02   0.572 0.567555
## intronic     3.898e-04  1.780e-04  2.701e+02   2.190 0.029398 *
## CDS          -6.497e-04  1.679e-04  2.704e+02  -3.869 0.000137 ***
## utr          3.784e-05  2.218e-04  2.691e+02   0.171 0.864645
## ---
## Signif. codes:  0 '***' 0.001 '**' 0.01 '*' 0.05 '.' 0.1 ' ' 1
##
## Correlation of Fixed Effects:
##           (Intr) intrgn intrnc CDS
## intergenic -0.047
## intronic   -0.011 -0.261
## CDS        -0.080 -0.121 -0.534
## utr        -0.010 -0.252 -0.360 -0.312

```

```
AIC(fit4a)
```

```
## [1] -1490.545
```

```
fit5a<-lmer(w_ma~exonic+intronic+intergenic+(1|anc),data0)
```

```
summary(fit5a)
```

```

## Linear mixed model fit by REML t-tests use Satterthwaite approximations
## to degrees of freedom [lmerMod]
## Formula: w_ma ~ exonic + intronic + intergenic + (1 | anc)
## Data: data0
##
## REML criterion at convergence: -1514.1
##
## Scaled residuals:
##   Min      1Q  Median      3Q      Max
## -2.95638 -0.59818  0.09337  0.65332  2.42064
##
## Random effects:
##   Groups   Name          Variance Std.Dev.
##   anc      (Intercept) 0.0000369 0.006075

```



```

## Residual          0.0001912 0.013827
## Number of obs: 276, groups:  anc, 5
##
## Fixed effects:
##           Estimate Std. Error      df t value Pr(>|t|)
## (Intercept) -1.556e-02  2.985e-03  4.670e+00  -5.213 0.004190 **
## exonic      -3.819e-04  1.126e-04  2.719e+02  -3.392 0.000798 ***
## intronic    3.799e-04  1.790e-04  2.708e+02   2.122 0.034754 *
## intergenic  3.426e-04  4.088e-04  2.699e+02   0.838 0.402712
## ---
## Signif. codes:  0 '***' 0.001 '**' 0.01 '*' 0.05 '.' 0.1 ' ' 1
##
## Correlation of Fixed Effects:
##           (Intr) exonic intrnc
## exonic      -0.076
## intronic    -0.011 -0.770
## intergenic  -0.040 -0.313 -0.256

```

AIC(fit5a)

```

## [1] -1502.125
##Mutational effects and stress, relative fitness and competitive fitness##
datan$treatment<-as.factor(datan$treatment)
fit<-lmer(rel2~treatment*type+(1|anc),datan)
summary(fit)

```

```

## Linear mixed model fit by REML t-tests use Satterthwaite approximations
##   to degrees of freedom [lmerMod]
## Formula: rel2 ~ treatment * type + (1 | anc)
##   Data: datan
##
## REML criterion at convergence: -3136
##
## Scaled residuals:
##   Min      1Q  Median      3Q      Max
## -3.9114 -0.5268 -0.0132  0.4701  5.9191
##
## Random effects:
##   Groups   Name      Variance Std.Dev.
##   anc      (Intercept) 1.739e-05 0.00417
##   Residual                1.376e-04 0.01173
## Number of obs: 527, groups:  anc, 5
##
## Fixed effects:
##           Estimate Std. Error      df t value Pr(>|t|)
## (Intercept)  9.998e-01  2.216e-03  6.900e+00 451.087 < 2e-16 ***
## treatment25  1.374e-04  1.722e-03  5.192e+02   0.080 0.93641
## typema      -4.616e-03  1.483e-03  5.191e+02  -3.113 0.00195 **
## treatment25:typema 3.627e-03  2.141e-03  5.191e+02   1.694 0.09079 .
## ---
## Signif. codes:  0 '***' 0.001 '**' 0.01 '*' 0.05 '.' 0.1 ' ' 1
##
## Correlation of Fixed Effects:
##           (Intr) trtm25 typema
## treatment25 -0.376

```

```
## typema      -0.436  0.561
## trtmnt25:ty  0.302 -0.804 -0.692
```

```
AIC(fit)
```

```
## [1] -3124.002
```

```
fita<-lmer(w_ma~treatment*type+(1|anc),datan)
summary(fita)
```

```
## Linear mixed model fit by REML t-tests use Satterthwaite approximations
## to degrees of freedom [lmerMod]
## Formula: w_ma ~ treatment * type + (1 | anc)
## Data: datan
##
## REML criterion at convergence: -2802.3
##
## Scaled residuals:
##   Min       1Q   Median       3Q      Max
## -3.4070 -0.5707  0.0583  0.6893  2.9823
##
## Random effects:
## Groups Name Variance Std.Dev.
## anc (Intercept) 2.475e-05 0.004975
## Residual 2.609e-04 0.016152
## Number of obs: 527, groups: anc, 5
##
## Fixed effects:
## Estimate Std. Error df t value Pr(>|t|)
## (Intercept) -1.288e-02 2.770e-03 8.000e+00 -4.652 0.001668 **
## treatment25 4.620e-03 2.371e-03 5.192e+02 1.949 0.051877 .
## typema -7.479e-03 2.042e-03 5.191e+02 -3.663 0.000275 ***
## treatment25:typema 1.621e-05 2.948e-03 5.191e+02 0.006 0.995613
## ---
## Signif. codes: 0 '***' 0.001 '**' 0.01 '*' 0.05 '.' 0.1 ' ' 1
##
## Correlation of Fixed Effects:
## (Intr) trtm25 typema
## treatment25 -0.414
## typema -0.480 0.561
## trtmnt25:ty 0.333 -0.804 -0.692
```

```
AIC(fita)
```

```
## [1] -2790.348
```

```
fit6<-lmer(rel2~total*treatment+(1|anc),datan)
summary(fit6)
```

```
## Linear mixed model fit by REML t-tests use Satterthwaite approximations
## to degrees of freedom [lmerMod]
## Formula: rel2 ~ total * treatment + (1 | anc)
## Data: datan
##
## REML criterion at convergence: -3115.4
##
## Scaled residuals:
```

```

##      Min      1Q  Median      3Q      Max
## -4.1506 -0.5261  0.0351  0.4552  5.8785
##
## Random effects:
## Groups   Name          Variance Std.Dev.
## anc      (Intercept) 1.354e-05 0.00368
## Residual                1.386e-04 0.01177
## Number of obs: 527, groups:  anc, 5
##
## Fixed effects:
##              Estimate Std. Error      df t value Pr(>|t|)
## (Intercept)    9.986e-01  1.939e-03  6.300e+00  514.903  6.66e-16 ***
## total          -4.568e-05  1.915e-05  5.231e+02  -2.386   0.0174 *
## treatment25    1.711e-03  1.448e-03  5.194e+02   1.181   0.2380
## total:treatment25 2.055e-05  2.652e-05  5.191e+02   0.775   0.4387
## ---
## Signif. codes:  0 '***' 0.001 '**' 0.01 '*' 0.05 '.' 0.1 ' ' 1
##
## Correlation of Fixed Effects:
##              (Intr) total  trtm25
## total          -0.381
## treatment25   -0.360  0.480
## ttl:trtmn25   0.255 -0.679 -0.704

```

```
AIC(fit6)
```

```
## [1] -3103.42
```

```
fit6a<-lmer(w_ma~total*treatment+(1|anc),datan)
summary(fit6a)
```

```

## Linear mixed model fit by REML t-tests use Satterthwaite approximations
## to degrees of freedom [lmerMod]
## Formula: w_ma ~ total * treatment + (1 | anc)
## Data: datan
##
## REML criterion at convergence: -2774.2
##
## Scaled residuals:
##      Min      1Q  Median      3Q      Max
## -3.4735 -0.5532  0.1107  0.6709  2.8995
##
## Random effects:
## Groups   Name          Variance Std.Dev.
## anc      (Intercept) 3.635e-05 0.006029
## Residual                2.656e-04 0.016298
## Number of obs: 527, groups:  anc, 5
##
## Fixed effects:
##              Estimate Std. Error      df t value Pr(>|t|)
## (Intercept)   -1.514e-02  3.048e-03  5.600e+00  -4.969  0.00302 **
## total         -6.614e-05  2.653e-05  5.227e+02  -2.493  0.01296 *
## treatment25    5.337e-03  2.005e-03  5.193e+02   2.662  0.00801 **
## total:treatment25 -1.690e-05  3.671e-05  5.191e+02  -0.460  0.64536
## ---

```

```

## Signif. codes:  0 '***' 0.001 '**' 0.01 '*' 0.05 '.' 0.1 ' ' 1
##
## Correlation of Fixed Effects:
##           (Intr) total  trtm25
## total      -0.336
## treatment25 -0.317  0.480
## ttl:trtmn25  0.225 -0.678 -0.704

```

```
AIC(fit6a)
```

```
## [1] -2762.16
```

```
fit7<-lmer(rel2~SNP*treatment+indel*treatment+(1|anc),datan)
summary(fit7)
```

```

## Linear mixed model fit by REML t-tests use Satterthwaite approximations
## to degrees of freedom [lmerMod]
## Formula: rel2 ~ SNP * treatment + indel * treatment + (1 | anc)
## Data: datan
##
## REML criterion at convergence: -3084.7
##
## Scaled residuals:
##      Min       1Q   Median       3Q      Max
## -4.1550 -0.5009  0.0317  0.4497  5.8273
##
## Random effects:
## Groups Name          Variance Std.Dev.
## anc    (Intercept)  1.333e-05 0.003651
## Residual              1.387e-04 0.011777
## Number of obs: 527, groups:  anc, 5
##
## Fixed effects:
##              Estimate Std. Error      df t value Pr(>|t|)
## (Intercept)   9.986e-01  1.928e-03  6.400e+00  517.858  6.66e-16 ***
## SNP           -3.356e-05  2.784e-05  5.211e+02  -1.205   0.229
## treatment25   1.690e-03  1.449e-03  5.174e+02   1.166   0.244
## indel         -1.010e-04  9.567e-05  5.205e+02  -1.056   0.292
## SNP:treatment25 -1.622e-05  3.843e-05  5.171e+02  -0.422   0.673
## treatment25:indel 1.911e-04  1.312e-04  5.172e+02   1.456   0.146
## ---
## Signif. codes:  0 '***' 0.001 '**' 0.01 '*' 0.05 '.' 0.1 ' ' 1
##
## Correlation of Fixed Effects:
##           (Intr) SNP    trtm25 indel  SNP:25
## SNP          -0.262
## treatment25 -0.362  0.328
## indel        -0.080 -0.574  0.098
## SNP:trtmn25  0.176 -0.681 -0.479  0.385
## trtmnt25:nd  0.054  0.385 -0.152 -0.668 -0.569

```

```
AIC(fit7)
```

```
## [1] -3068.731
```

```
fit7a<-lmer(w_ma~SNP*treatment+indel*treatment+(1|anc),datan)
summary(fit7a)
```

```

## Linear mixed model fit by REML t-tests use Satterthwaite approximations
## to degrees of freedom [lmerMod]
## Formula: w_ma ~ SNP * treatment + indel * treatment + (1 | anc)
## Data: datan
##
## REML criterion at convergence: -2744.8
##
## Scaled residuals:
## Min 1Q Median 3Q Max
## -3.4503 -0.5482 0.1130 0.6522 2.9541
##
## Random effects:
## Groups Name Variance Std.Dev.
## anc (Intercept) 3.764e-05 0.006135
## Residual 2.656e-04 0.016297
## Number of obs: 527, groups: anc, 5
##
## Fixed effects:
## Estimate Std. Error df t value Pr(>|t|)
## (Intercept) -1.514e-02 3.090e-03 5.600e+00 -4.899 0.00335 **
## SNP -5.663e-05 3.857e-05 5.206e+02 -1.468 0.14268
## treatment25 5.306e-03 2.005e-03 5.173e+02 2.647 0.00837 **
## indel -1.091e-04 1.326e-04 5.210e+02 -0.823 0.41089
## SNP:treatment25 -6.350e-05 5.318e-05 5.170e+02 -1.194 0.23301
## treatment25:indel 1.997e-04 1.815e-04 5.171e+02 1.100 0.27188
## ---
## Signif. codes: 0 '***' 0.001 '**' 0.01 '*' 0.05 '.' 0.1 ' ' 1
##
## Correlation of Fixed Effects:
## (Intr) SNP trtm25 indel SNP:25
## SNP -0.226
## treatment25 -0.313 0.328
## indel -0.069 -0.574 0.098
## SNP:trtmn25 0.152 -0.680 -0.479 0.385
## trtmnt25:nd 0.046 0.385 -0.152 -0.667 -0.569

```

```
AIC(fit7a)
```

```
## [1] -2728.757
```

```
fit8<-lmer(rel2~nonsynonymous*treatment+synonymous*treatment+(1|anc),datan)
summary(fit8)
```

```

## Linear mixed model fit by REML t-tests use Satterthwaite approximations
## to degrees of freedom [lmerMod]
## Formula: rel2 ~ nonsynonymous * treatment + synonymous * treatment + (1 |
## anc)
## Data: datan
##
## REML criterion at convergence: -3103.8
##
## Scaled residuals:
## Min 1Q Median 3Q Max
## -4.2516 -0.5034 0.0107 0.4700 5.8186
##

```

```

## Random effects:
## Groups Name Variance Std.Dev.
## anc (Intercept) 0.0000118 0.003436
## Residual 0.0001362 0.011671
## Number of obs: 527, groups: anc, 5
##
## Fixed effects:
## Estimate Std. Error df t value
## (Intercept) 9.991e-01 1.838e-03 6.600e+00 543.519
## nonsynonymous -1.412e-04 1.346e-04 5.201e+02 -1.049
## treatment25 1.590e-03 1.423e-03 5.174e+02 1.117
## synonymous -2.697e-04 2.576e-04 5.194e+02 -1.047
## nonsynonymous:treatment25 -2.717e-04 1.899e-04 5.171e+02 -1.431
## treatment25:synonymous 7.529e-04 3.692e-04 5.171e+02 2.039
## Pr(>|t|)
## (Intercept) <2e-16 ***
## nonsynonymous 0.2948
## treatment25 0.2644
## synonymous 0.2956
## nonsynonymous:treatment25 0.1531
## treatment25:synonymous 0.0419 *
## ---
## Signif. codes: 0 '***' 0.001 '**' 0.01 '*' 0.05 '.' 0.1 ' ' 1
##
## Correlation of Fixed Effects:
## (Intr) nnsynn trtm25 synnym nns:25
## nonsynonyms -0.141
## treatment25 -0.374 0.167
## synonymous -0.119 -0.782 0.148
## nnsynn:25 0.090 -0.686 -0.234 0.544
## trtmnt25:sy 0.079 0.536 -0.215 -0.682 -0.793

```

AIC(fit8)

```
## [1] -3087.783
```

```
fit8a<-lmer(w_ma~nonsynonymous*treatment+synonymous*treatment+(1|anc),datan)
summary(fit8a)
```

```

## Linear mixed model fit by REML t-tests use Satterthwaite approximations
## to degrees of freedom [lmerMod]
## Formula: w_ma ~ nonsynonymous * treatment + synonymous * treatment + (1 |
## anc)
## Data: datan
##
## REML criterion at convergence: -2760.7
##
## Scaled residuals:
## Min 1Q Median 3Q Max
## -3.5390 -0.5785 0.1215 0.6873 2.9022
##
## Random effects:
## Groups Name Variance Std.Dev.
## anc (Intercept) 3.998e-05 0.006323
## Residual 2.621e-04 0.016190

```

```

## Number of obs: 527, groups:  anc, 5
##
## Fixed effects:
##              Estimate Std. Error      df t value
## (Intercept)   -1.443e-02  3.156e-03  5.400e+00  -4.571
## nonsynonymous -2.940e-04  1.869e-04  5.191e+02  -1.574
## treatment25    4.962e-03  1.974e-03  5.172e+02   2.513
## synonymous    -2.008e-04  3.576e-04  5.185e+02  -0.562
## nonsynonymous:treatment25 -2.110e-04  2.635e-04  5.170e+02  -0.801
## treatment25:synonymous  3.470e-04  5.122e-04  5.170e+02   0.678
##              Pr(>|t|)
## (Intercept)    0.00489 **
## nonsynonymous  0.11619
## treatment25    0.01227 *
## synonymous     0.57464
## nonsynonymous:treatment25 0.42346
## treatment25:synonymous  0.49837
## ---
## Signif. codes:  0 '***' 0.001 '**' 0.01 '*' 0.05 '.' 0.1 ' ' 1
##
## Correlation of Fixed Effects:
##              (Intr) nnsynn trtm25 synnym nns:25
## nonsynonyms -0.114
## treatment25 -0.302  0.167
## synonymous  -0.096 -0.781  0.148
## nnsynn:25   0.073 -0.686 -0.234  0.544
## trtmnt25:sy 0.064  0.535 -0.215 -0.681 -0.793

```

AIC(fit8a)

```

## [1] -2744.692

```

```

fit9<-lmer(rel2~intergenic*treatment+intronic*treatment+CDS*treatment+utr*treatment+(1|anc),datan)
summary(fit9)

```

```

## Linear mixed model fit by REML t-tests use Satterthwaite approximations
## to degrees of freedom [lmerMod]
## Formula: rel2 ~ intergenic * treatment + intronic * treatment + CDS *
## treatment + utr * treatment + (1 | anc)
## Data: datan
##
## REML criterion at convergence: -3050
##
## Scaled residuals:
##      Min       1Q   Median       3Q      Max
## -4.3017 -0.5331  0.0177  0.4521  5.6908
##
## Random effects:
## Groups Name Variance Std.Dev.
## anc (Intercept) 1.097e-05 0.003312
## Residual 1.348e-04 0.011609
## Number of obs: 527, groups:  anc, 5
##
## Fixed effects:
##              Estimate Std. Error      df t value Pr(>|t|)

```

```

## (Intercept)          9.988e-01  1.798e-03  6.600e+00 555.588 < 2e-16
## intergenic          1.729e-04  3.410e-04  5.160e+02  0.507 0.612305
## treatment25        1.509e-03  1.440e-03  5.134e+02  1.048 0.295291
## intronic           2.979e-04  1.481e-04  5.164e+02  2.011 0.044820
## CDS                -4.824e-04  1.394e-04  5.167e+02 -3.460 0.000585
## utr                -9.381e-06  1.796e-04  5.143e+02 -0.052 0.958366
## intergenic:treatment25 6.586e-04  4.861e-04  5.131e+02  1.355 0.176016
## treatment25:intronic -2.182e-04  2.093e-04  5.131e+02 -1.042 0.297787
## treatment25:CDS      6.138e-05  1.992e-04  5.131e+02  0.308 0.758057
## treatment25:utr      6.739e-05  2.468e-04  5.131e+02  0.273 0.784903

```

```

## (Intercept)          ***
## intergenic
## treatment25
## intronic             *
## CDS                  ***
## utr
## intergenic:treatment25
## treatment25:intronic
## treatment25:CDS
## treatment25:utr

```

```

## Signif. codes:  0 '***' 0.001 '**' 0.01 '*' 0.05 '.' 0.1 ' ' 1

```

```

## Correlation of Fixed Effects:

```

```

##          (Intr) intrgn trtm25 intrnc CDS      utr      int:25 trtmnt25:n
## intergenic -0.068
## treatment25 -0.387  0.091
## intronic    -0.029 -0.272  0.051
## CDS         -0.093 -0.136  0.102 -0.527
## utr         0.005 -0.222 -0.026 -0.357 -0.324
## intrgnc:t25 0.051 -0.682 -0.126  0.193  0.107  0.122
## trtmnt25:nt 0.033  0.194 -0.084 -0.683  0.351  0.237 -0.285
## trtmn25:CDS 0.052  0.106 -0.131  0.348 -0.669  0.220 -0.153 -0.526
## trtmnt25:tr -0.016  0.128  0.033  0.244  0.226 -0.660 -0.195 -0.331
##          t25:CD

```

```

## intergenic
## treatment25
## intronic
## CDS
## utr
## intrgnc:t25
## trtmnt25:nt
## trtmn25:CDS
## trtmnt25:tr -0.352

```

```

AIC(fit9)

```

```

## [1] -3026.008

```

```

fit9a<-lmer(w_ma~intergenic*treatment+intronic*treatment+CDS*treatment+utr*treatment+(1|anc),datan)
summary(fit9a)

```

```

## Linear mixed model fit by REML t-tests use Satterthwaite approximations
## to degrees of freedom [lmerMod]

```



```

## Formula: w_ma ~ intergenic * treatment + intronic * treatment + CDS *
##      treatment + utr * treatment + (1 | anc)
##      Data: datan
##
## REML criterion at convergence: -2710.2
##
## Scaled residuals:
##      Min      1Q  Median      3Q      Max
## -3.9601 -0.5728  0.1077  0.6679  3.0266
##
## Random effects:
##      Groups   Name      Variance Std.Dev.
##      anc      (Intercept) 4.552e-05 0.006747
##      Residual      2.586e-04 0.016082
## Number of obs: 527, groups:  anc, 5
##
## Fixed effects:
##
##              Estimate Std. Error      df t value Pr(>|t|)
## (Intercept)    -1.479e-02  3.332e-03  5.200e+00  -4.440  0.00617
## intergenic      3.029e-04  4.728e-04  5.147e+02   0.641  0.52202
## treatment25     5.007e-03  1.995e-03  5.132e+02   2.510  0.01240
## intronic        4.379e-04  2.054e-04  5.150e+02   2.132  0.03351
## CDS             -6.880e-04  1.934e-04  5.153e+02  -3.557  0.00041
## utr            -5.899e-05  2.497e-04  5.170e+02  -0.236  0.81334
## intergenic:treatment25  7.810e-04  6.734e-04  5.130e+02   1.160  0.24665
## treatment25:intronic -4.535e-04  2.900e-04  5.130e+02  -1.564  0.11843
## treatment25:CDS     2.371e-04  2.759e-04  5.130e+02   0.859  0.39064
## treatment25:utr    -5.344e-05  3.419e-04  5.130e+02  -0.156  0.87584
##
## (Intercept)      **
## intergenic
## treatment25      *
## intronic         *
## CDS              ***
## utr
## intergenic:treatment25
## treatment25:intronic
## treatment25:CDS
## treatment25:utr
## ---
## Signif. codes:  0 '***' 0.001 '**' 0.01 '*' 0.05 '.' 0.1 ' ' 1
##
## Correlation of Fixed Effects:
##      (Intr) intrgn trtm25 intrnc CDS      utr      int:25 trtmnt25:n
## intergenic  -0.050
## treatment25 -0.290  0.091
## intronic    -0.021 -0.271  0.050
## CDS         -0.070 -0.135  0.102 -0.528
## utr         0.002 -0.225 -0.026 -0.358 -0.323
## intrgnc:t25 0.038 -0.681 -0.126  0.193  0.107  0.121
## trtmnt25:nt 0.024  0.194 -0.084 -0.682  0.350  0.236 -0.285
## trtmn25:CDS 0.039  0.106 -0.131  0.347 -0.668  0.219 -0.153 -0.526
## trtmnt25:tr -0.012  0.127  0.033  0.244  0.226 -0.658 -0.195 -0.331
##
##              t25:CD

```

```
## intergenic
## treatment25
## intronic
## CDS
## utr
## intrgnc:t25
## trtmnt25:nt
## trtmn25:CDS
## trtmnt25:tr -0.352
```

```
AIC(fit9a)
```

```
## [1] -2686.176
```

```
fit10<-lmer(rel2~exonic*treatment+intronic*treatment+intergenic*treatment+(1|anc),datan)
summary(fit10)
```

```
## Linear mixed model fit by REML t-tests use Satterthwaite approximations
## to degrees of freedom [lmerMod]
## Formula: rel2 ~ exonic * treatment + intronic * treatment + intergenic *
## treatment + (1 | anc)
## Data: datan
##
## REML criterion at convergence: -3073.6
##
## Scaled residuals:
## Min 1Q Median 3Q Max
## -4.3060 -0.5120 0.0266 0.4446 5.6531
##
## Random effects:
## Groups Name Variance Std.Dev.
## anc (Intercept) 8.818e-06 0.00297
## Residual 1.359e-04 0.01166
## Number of obs: 527, groups: anc, 5
##
## Fixed effects:
## Estimate Std. Error df t value Pr(>|t|)
## (Intercept) 9.987e-01 1.673e-03 7.400e+00 596.791 < 2e-16
## exonic -2.989e-04 9.141e-05 5.163e+02 -3.270 0.00115
## treatment25 1.556e-03 1.440e-03 5.155e+02 1.081 0.28027
## intronic 2.922e-04 1.486e-04 5.188e+02 1.966 0.04980
## intergenic 2.495e-04 3.413e-04 5.177e+02 0.731 0.46521
## exonic:treatment25 6.610e-05 1.260e-04 5.151e+02 0.525 0.59999
## treatment25:intronic -2.277e-04 2.097e-04 5.151e+02 -1.086 0.27814
## treatment25:intergenic 6.688e-04 4.880e-04 5.151e+02 1.371 0.17113
##
## (Intercept) ***
## exonic **
## treatment25
## intronic *
## intergenic
## exonic:treatment25
## treatment25:intronic
## treatment25:intergenic
## ---
```

```

## Signif. codes:  0 '***' 0.001 '**' 0.01 '*' 0.05 '.' 0.1 ' ' 1
##
## Correlation of Fixed Effects:
##          (Intr) exonic trtm25 intrnc intrgn exn:25 trtmnt25:ntrn
## exonic      -0.085
## treatment25 -0.415  0.070
## intronic     -0.034 -0.768  0.054
## intergenic   -0.069 -0.305  0.088 -0.269
## exnc:trtm25  0.038 -0.669 -0.092  0.524  0.205
## trtmnt25:ntrn 0.037  0.510 -0.091 -0.684  0.194 -0.761
## trtmnt25:ntrg 0.053  0.198 -0.122  0.191 -0.685 -0.306 -0.281

```

AIC(fit10)

```

## [1] -3053.563

```

```

fit10a<-lmer(w_ma~exonic*treatment+intronic*treatment+intergenic*treatment+(1|anc),datan)
summary(fit10a)

```

```

## Linear mixed model fit by REML t-tests use Satterthwaite approximations
## to degrees of freedom [lmerMod]
## Formula: w_ma ~ exonic * treatment + intronic * treatment + intergenic *
## treatment + (1 | anc)
## Data: datan
##
## REML criterion at convergence: -2734.4
##
## Scaled residuals:
##      Min       1Q   Median       3Q      Max
## -3.9401 -0.5739  0.1027  0.6711  3.0341
##
## Random effects:
## Groups Name          Variance Std.Dev.
## anc    (Intercept) 5.029e-05 0.007091
## Residual          2.593e-04 0.016102
## Number of obs: 527, groups:  anc, 5
##
## Fixed effects:
##              Estimate Std. Error      df t value Pr(>|t|)
## (Intercept) -1.500e-02  3.471e-03  5.100e+00 -4.323 0.007229
## exonic      -4.375e-04  1.268e-04  5.186e+02 -3.450 0.000606
## treatment25  5.165e-03  1.989e-03  5.152e+02  2.597 0.009669
## intronic     4.251e-04  2.056e-04  5.169e+02  2.068 0.039121
## intergenic   3.897e-04  4.719e-04  5.161e+02  0.826 0.409303
## exonic:treatment25 1.171e-04  1.740e-04  5.150e+02  0.673 0.501221
## treatment25:intronic -4.528e-04  2.897e-04  5.150e+02 -1.563 0.118621
## treatment25:intergenic 7.719e-04  6.739e-04  5.150e+02  1.145 0.252584
##
## (Intercept)      **
## exonic            ***
## treatment25      **
## intronic          *
## intergenic
## exonic:treatment25
## treatment25:intronic

```

```

## treatment25:intergenic
## ---
## Signif. codes:  0 '***' 0.001 '**' 0.01 '*' 0.05 '.' 0.1 ' ' 1
##
## Correlation of Fixed Effects:
##          (Intr) exonic trtm25 intrnc intrgn exn:25 trtmnt25:ntrn
## exonic          -0.059
## treatment25     -0.277  0.071
## intronic         -0.021 -0.768  0.054
## intergenic       -0.045 -0.306  0.088 -0.267
## exnc:trtm25      0.025 -0.666 -0.092  0.523  0.205
## trtmnt25:ntrn    0.025  0.507 -0.091 -0.682  0.194 -0.761
## trtmnt25:ntrg    0.036  0.197 -0.122  0.191 -0.684 -0.306 -0.281

```

AIC(fit10a)

```
## [1] -2714.45
```
